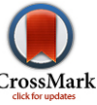

## Correction

# Correction: Identification and Analysis of Differential miRNAs in PK-15 Cells after Foot-and-Mouth Disease Virus Infection

## The PLOS ONE Staff

There is an error in the first name of the co-author, Dr. Xian-Tao Liu. The correct name for this co-author is: Dr. Xiang-Tao Liu.

## Reference

1. Zhang K-S, Liu Y-J, Kong H-J, Cheng W-W, Shang Y-J, et al. (2014) Identification and Analysis of Differential miRNAs in PK-15 Cells after Foot-and-Mouth Disease Virus Infection. PLoS ONE 9(3): e90865. doi:10.1371/journal.pone.0090865

---

**Citation:** The PLOS ONE Staff (2014) Correction: Identification and Analysis of Differential miRNAs in PK-15 Cells after Foot-and-Mouth Disease Virus Infection. PLoS ONE 9(6): e101635. doi:10.1371/journal.pone.0101635

**Published:** June 24, 2014

**Copyright:** © 2014 The PLOS ONE Staff. This is an open-access article distributed under the terms of the Creative Commons Attribution License, which permits unrestricted use, distribution, and reproduction in any medium, provided the original author and source are credited.
